# Supplementary material
Source: PubMed Central journal article supplement (PMC4029945)
Supplement: NIHMS581472-supplement-01.pdf [file NIHMS581472-supplement-01.pdf]

**Supplementary Table 1. List of previous case-control studies where women in this study were previously controls. NHS 1989-1990.**

|                               | N controls  |
|-------------------------------|-------------|
| Myocardial Infarction         | 481         |
| Diabetes                      | 580         |
| Rheumatoid Arthritis          | 212         |
| Stroke                        | 239         |
| Parkinson's disease           | 317         |
| Colon Cancer                  | 384         |
| Colon Polyps                  | 334         |
| Breast Cancer                 | 708         |
| Endometrial Cancer            | 251         |
| Multiple Myeloma              | 50          |
| Pancreatic Cancer             | 171         |
| Ovarian Cancer                | 227         |
| Glaucoma                      | 283         |
| Peripheral Arterial Disease   | 264         |
| Sudden Death                  | 179         |
| Within Person Stability Study | 76          |
| <b>Total</b>                  | <b>4756</b> |

**Supplementary Table 2. Associations between IL-6 levels and incident clinical depression (broad definition) stratified by menopausal status and use of hormonal replacement therapy. NHS 1989-2010.**

|                                                                         | IL-6  |                  |                  |                  | P trend |
|-------------------------------------------------------------------------|-------|------------------|------------------|------------------|---------|
|                                                                         | Q1    | Q2               | Q3               | Q4               |         |
| <b>Premenopausal (n=449)</b>                                            |       |                  |                  |                  |         |
| Number of events                                                        | 24    | 12               | 9                | 18               |         |
| Person-years                                                            | 1,369 | 1,463            | 1,426            | 1,381            |         |
| Age adjusted RR                                                         | 1.00  | 0.55 (0.24-1.25) | 0.32 (0.13-0.78) | 0.73 (0.33-1.61) | 0.29    |
| Age and BMI adjusted RR                                                 | 1.00  | 0.50 (0.22-1.18) | 0.28 (0.11-0.73) | 0.66 (0.27-1.61) | 0.23    |
| Multivariate adjusted RR <sup>1</sup>                                   | 1.00  | 0.25 (0.06-1.04) | 0.24 (0.06-0.89) | 0.48 (0.13-1.79) | 0.20    |
| <b>Hormone replacement therapy users at time of blood draw (n=1041)</b> |       |                  |                  |                  |         |
| Number of events                                                        | 42    | 48               | 40               | 58               |         |
| Person-years                                                            | 3,190 | 3,079            | 3,076            | 2,865            |         |
| Age adjusted RR                                                         | 1.00  | 1.43 (0.86-2.37) | 1.15 (0.69-1.93) | 1.72 (1.04-2.82) | 0.06    |
| Age and BMI adjusted RR                                                 | 1.00  | 1.44 (0.86-2.40) | 1.16 (0.68-1.96) | 1.73 (1.04-2.89) | 0.06    |
| Multivariate adjusted RR                                                | 1.00  | 1.78 (1.02-3.11) | 1.29 (0.72-2.31) | 1.93 (1.08-3.43) | 0.07    |
| <b>Never/past hormone replacement therapy users (n=1089)</b>            |       |                  |                  |                  |         |
| Number of events                                                        | 39    | 37               | 47               | 38               |         |
| Person-years                                                            | 3,270 | 3,289            | 3,164            | 3,221            |         |
| Age adjusted RR                                                         | 1.00  | 1.21 (0.71-2.04) | 1.47 (0.90-2.41) | 1.17 (0.68-2.01) | 0.46    |
| Age and BMI adjusted RR                                                 | 1.00  | 1.19 (0.70-2.04) | 1.41 (0.85-2.36) | 1.08 (0.61-1.90) | 0.71    |
| Multivariate adjusted RR                                                | 1.00  | 1.27 (0.70-2.30) | 1.56 (0.88-2.75) | 1.21 (0.64-2.28) | 0.47    |

<sup>1</sup>Adjusted for age, BMI (<20, 20-23, 23-25, 25-28 or ≥28 kg/m<sup>2</sup>), physical activity (METs/week in quintiles), smoking (never, past 1-24, past ≥25, current 1-24, current ≥25 packs per year), use of NSAIDs or aspirin (no use, use 1-4 days, 5-14 days, 15-21 days, ≥ 22 days/month) caffeine intake (quintiles), alcohol intake (never, <5, 5-10, 10-15 or > 15 mg/day), neighborhood socioeconomic status (quintiles), husband education (college/graduate school vs. completed high school or less), and personal education (completed master or doctorate program vs. registered nurse or bachelor) at time of blood draw.
